# Supplementary material
Source: PubMed Central journal article supplement (PMC8542634)

# Normal Neural Circuit

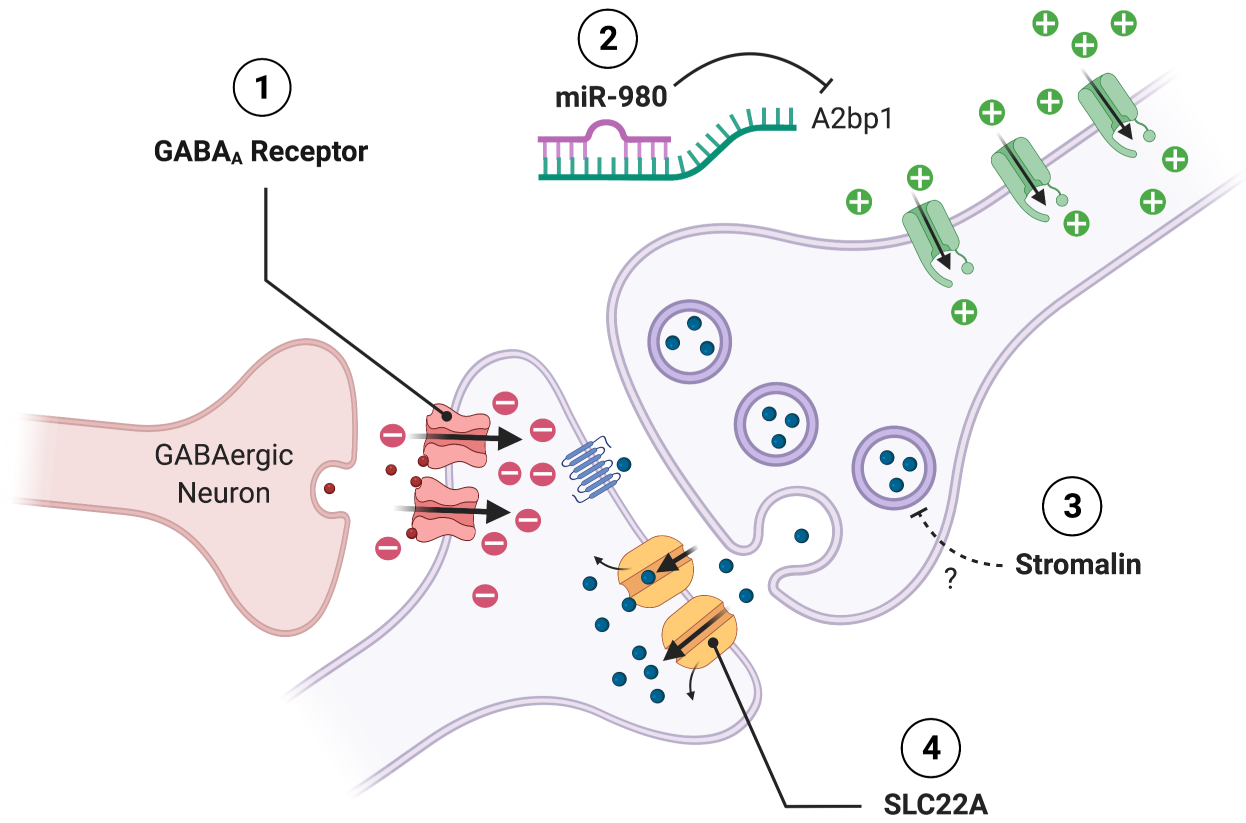

# Removing Memory Suppressors of Acquisition

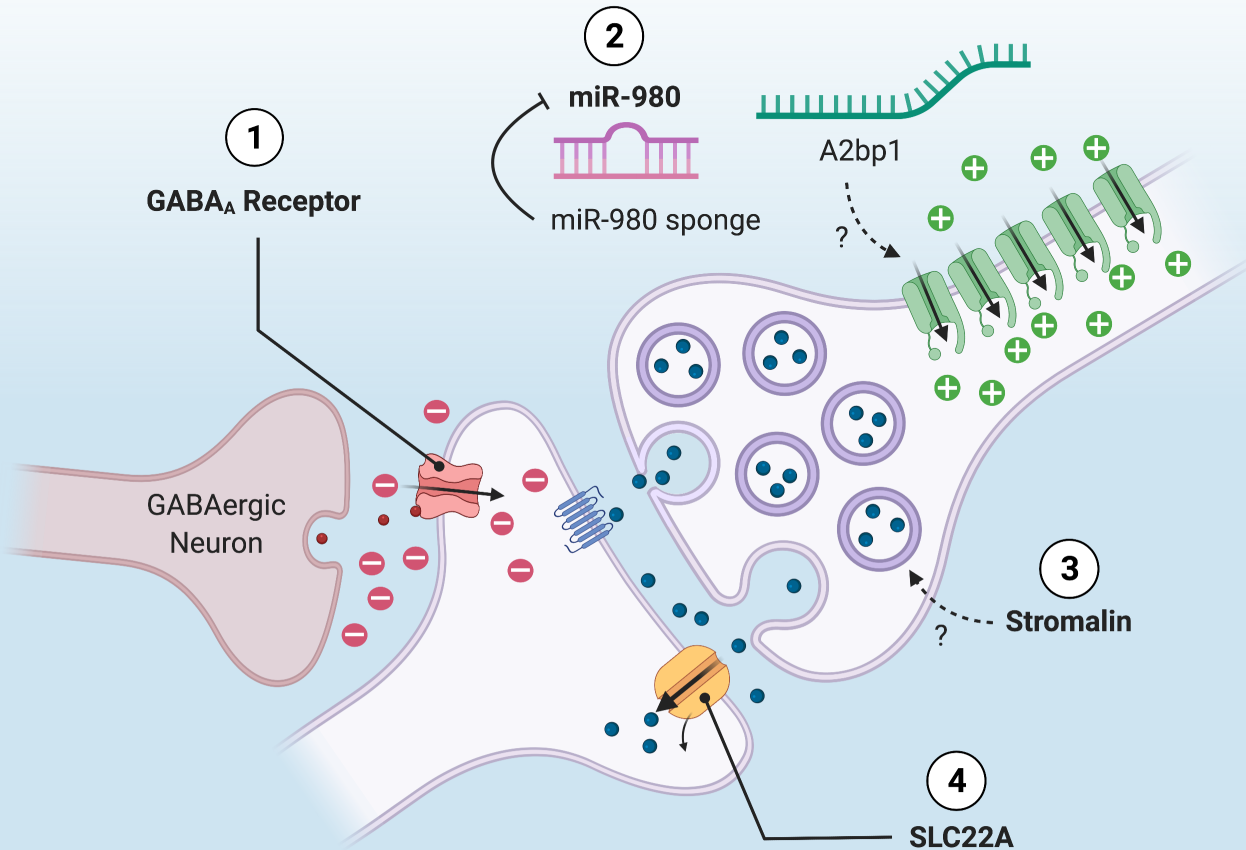

Supplement: NIHMS1731149-supplement-1.pdf [file NIHMS1731149-supplement-1.pdf]

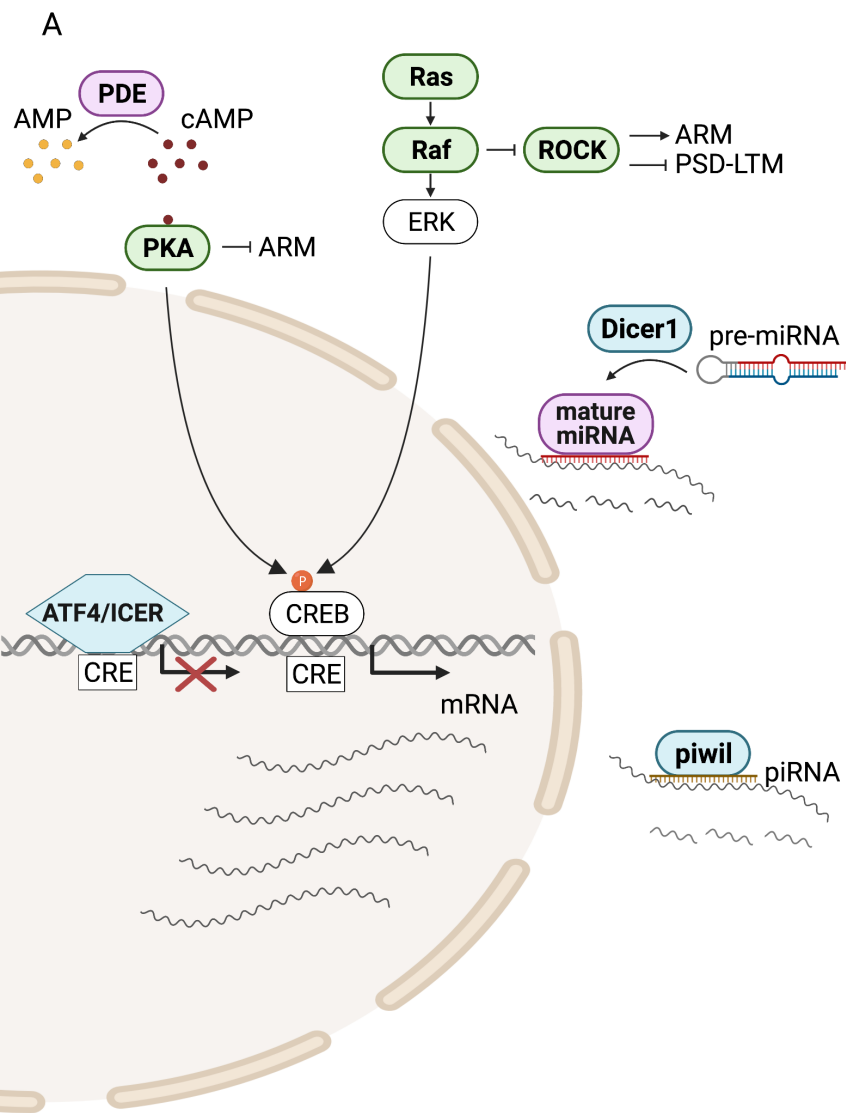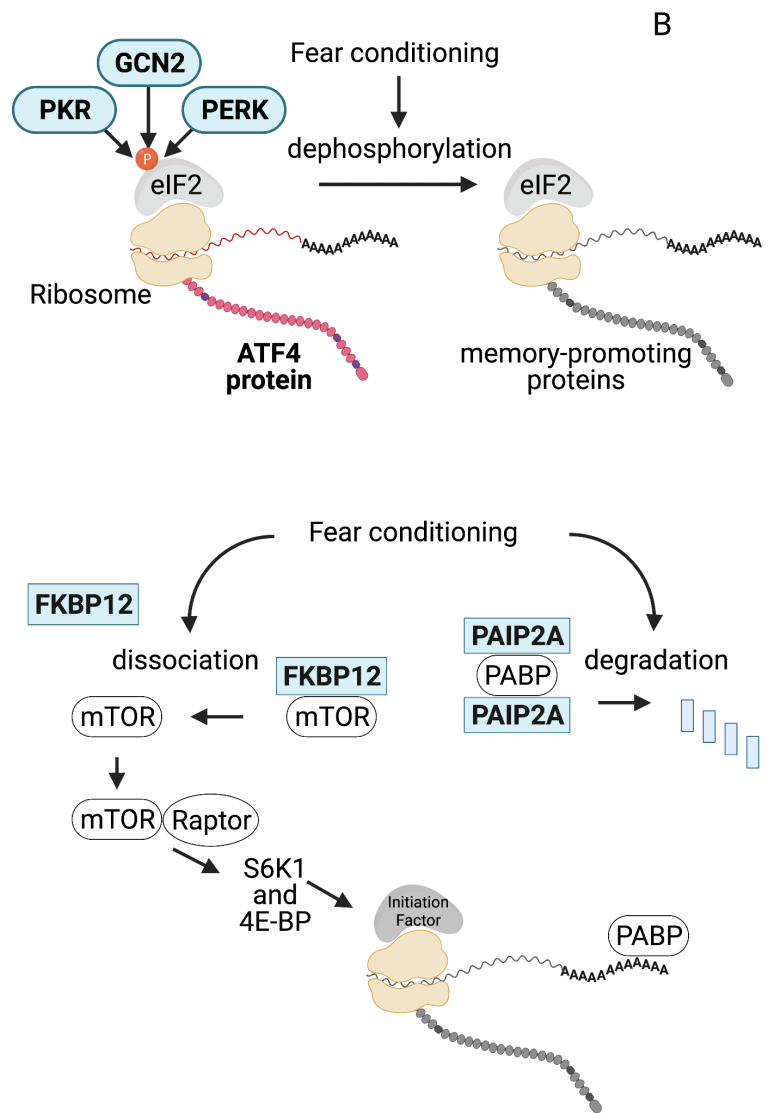

Supplement: NIHMS1731149-supplement-2.pdf [file NIHMS1731149-supplement-2.pdf]

A

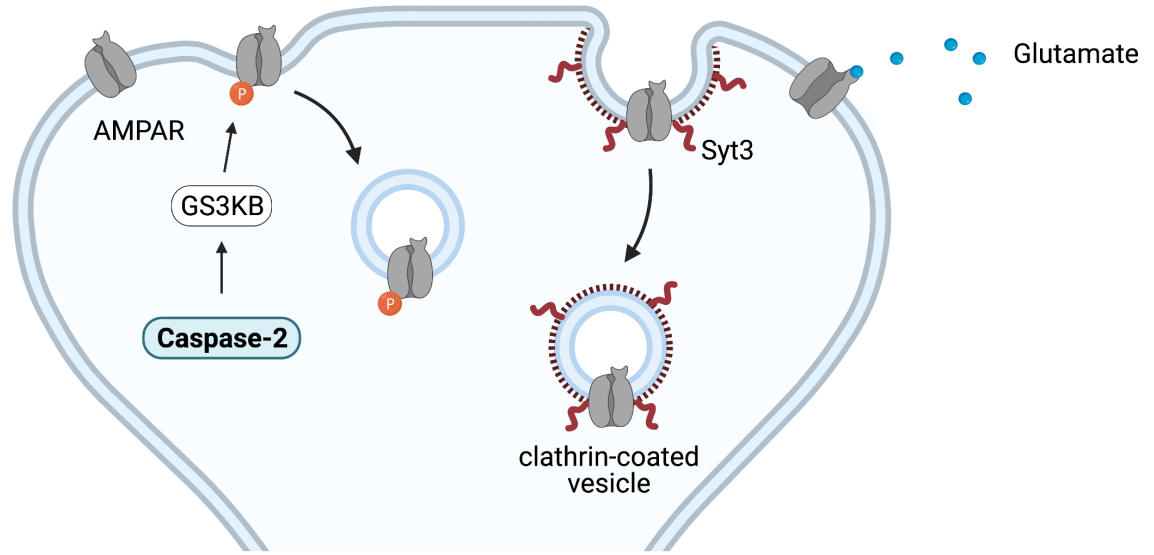

B

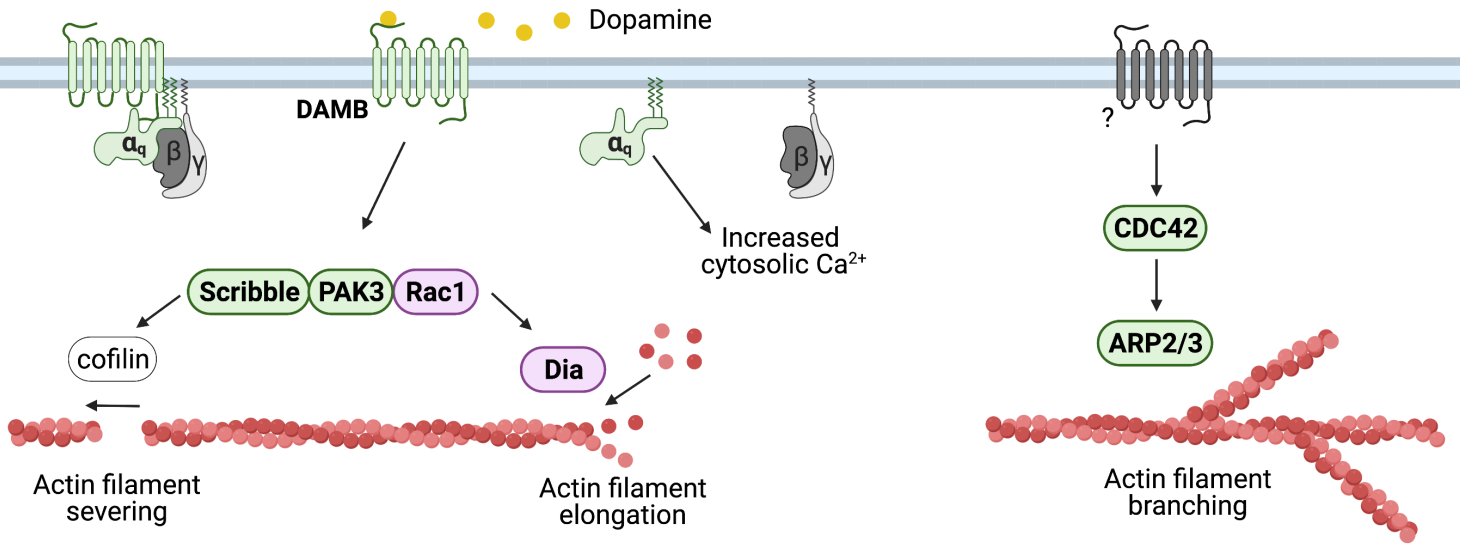

Supplement: NIHMS1731149-supplement-3.pdf [file NIHMS1731149-supplement-3.pdf]
